# Supplementary material for: Regional Changes in Density and Microarchitecture in the Ultradistal Tibia of Female Recruits After U.S. Army Basic Combat Training
Source: Springer Nature journal article supplement (doi:10.1007/s00223-019-00548-7), 2019-04-22
Supplement: MOESM1 [file 16667134]

**Article title:** Regional changes in density and microarchitecture in the ultradistal tibia of female recruits after U.S. Army Basic Combat Training

**Journal:** Calcified Tissue International

**Authors:** Aravind Sundaramurthy, Chun Xu, Julie M. Hughes, Erin Gaffney-Stomberg, Katelyn I. Guerriere, Kristin L. Popp, Mary L. Bouxsein, Jaques Reifman (corresponding author), and Ginu Unnikrishnan

**Affiliations and e-mail address for corresponding author:**

Department of Defense Biotechnology High Performance Computing Software  
Applications Institute, Fort Detrick, MD

jaques.reifman.civ@mail.mil

**Online resource 1**

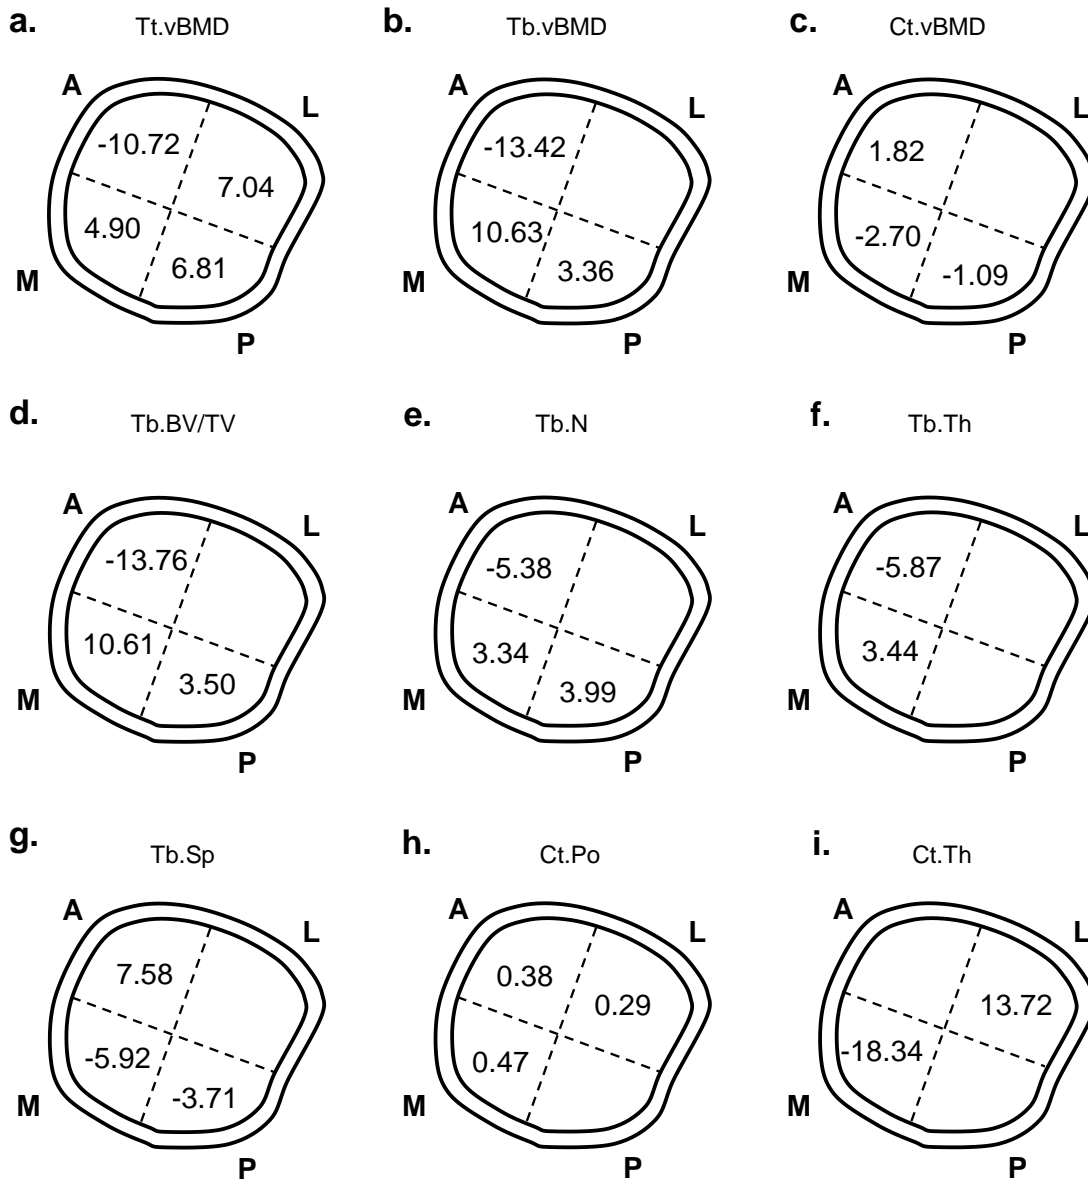

**Supplementary Fig. 1** Percentage change of density and microarchitectural parameters pre-BCT between sectors and cross-sectional measurements for all participants (n = 90). Sectors left blank were not significantly different from the entire cross section. A, Anterior; L, Lateral; M, Medial; P, Posterior.

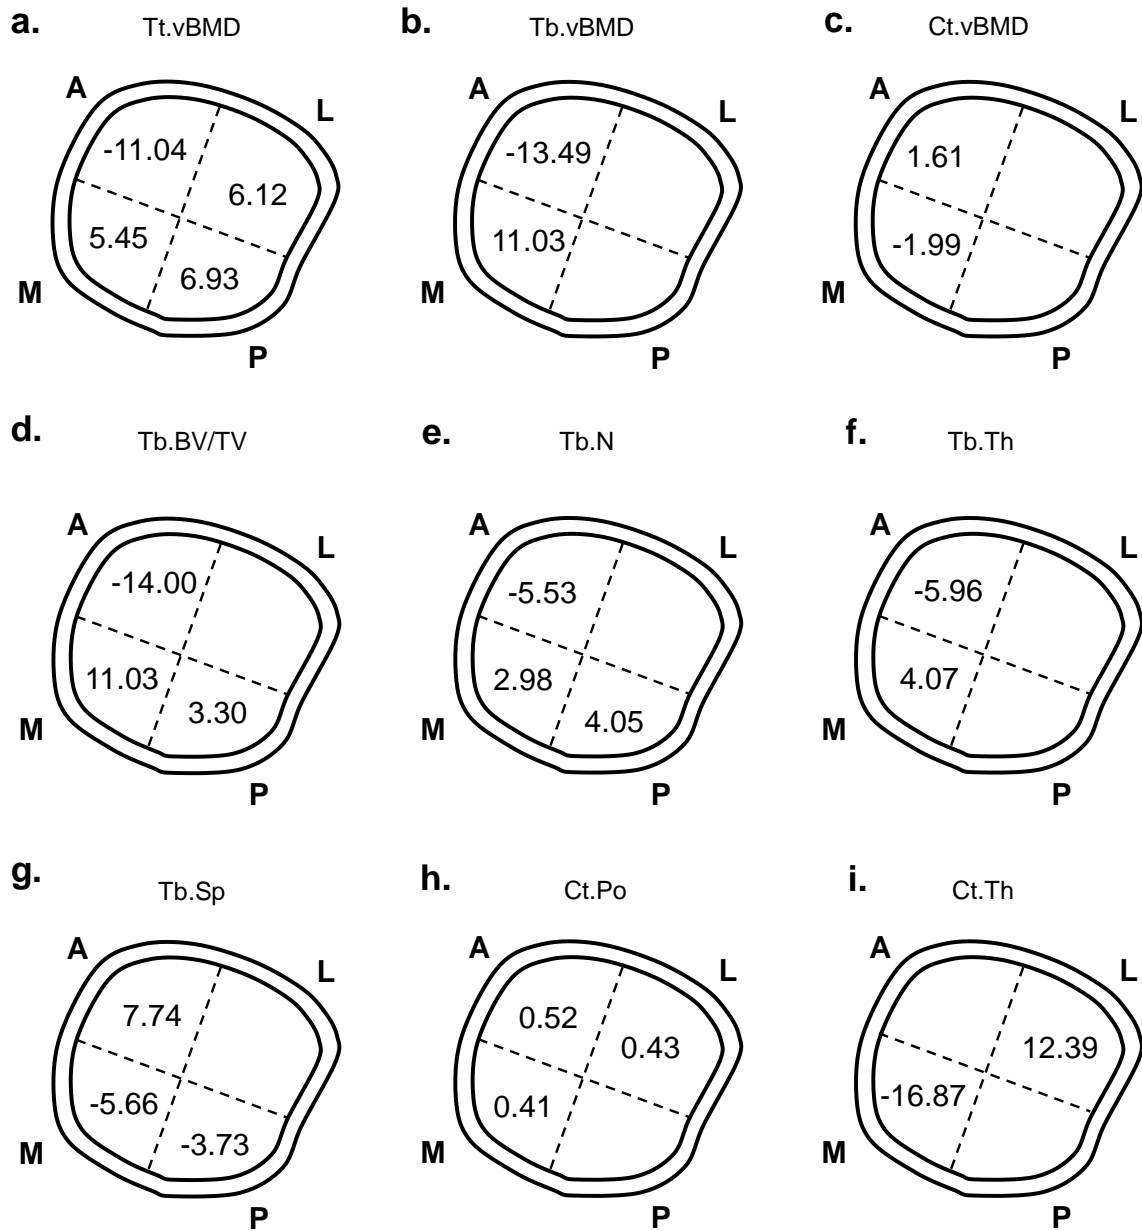

**Supplementary Fig. 2** Percentage change of density and microarchitectural parameters post-BCT between sectors and cross-sectional measurements for all participants (n = 90). Sectors left blank were not significantly different from the cross section. A, Anterior; L, Lateral; M, Medial; P, Posterior.
