# Supplementary material for: Regional Changes in Density and Microarchitecture in the Ultradistal Tibia of Female Recruits After U.S. Army Basic Combat Training
Source: Springer Nature journal article supplement (doi:10.1007/s00223-019-00548-7), 2019-04-22
Supplement: MOESM2 [file 16667134]

**Article title:** Regional changes in density and microarchitecture in the ultradistal tibia of female recruits after U.S. Army Basic Combat Training

**Journal:** Calcified Tissue International

**Authors:** Aravind Sundaramurthy, Chun Xu, Julie M. Hughes, Erin Gaffney-Stomberg, Katelyn I. Guerriere, Kristin L. Popp, Mary L. Bouxsein, Jaques Reifman (corresponding author), and Ginu Unnikrishnan

**Affiliations and e-mail address for corresponding author:**

Department of Defense Biotechnology High Performance Computing Software  
Applications Institute, Fort Detrick, MD

jaques.reifman.civ@mail.mil

## Online resource 2

**Supplementary Table 1** Absolute change, percentage change, and significance of change of density and microarchitectural parameters in the lateral sector. Each absolute change is presented as a mean difference (with the 95% confidence interval [CI] in parentheses). Each percentage change is presented as a mean (with one standard error [SE] of the mean in parentheses).

|                                                              | <b>Absolute change<br/>(95% CI)</b> | <b>% change<br/>(SE)</b> | <b>p-value</b> |
|--------------------------------------------------------------|-------------------------------------|--------------------------|----------------|
| <i>Volumetric bone mineral density (mgHA/cm<sup>3</sup>)</i> |                                     |                          |                |
| Tt.vBMD                                                      | 1.95 ( 0.67, 3.23)                  | 0.92 (0.31)              | 0.0033         |
| Tb.vBMD                                                      | 1.35 ( 0.18, 2.52)                  | 0.82 (0.37)              | 0.0239         |
| Ct.vBMD                                                      | -2.21 (-6.51, 2.08)                 | -0.21 (0.26)             | 0.3092         |
| <i>Trabecular microarchitectural parameters</i>              |                                     |                          |                |
| Tb.BV/TV                                                     | 0.002 ( 0.000, 0.003)               | 0.70 (0.37)              | 0.0524         |
| Tb.N (1/mm)                                                  | 0.016 (-0.002, 0.033)               | 1.01 (0.51)              | 0.0722         |
| Tb.Th (mm)                                                   | 0.001 ( 0.000, 0.045)               | 0.53 (0.21)              | 0.0201         |
| Tb.Sp (mm)                                                   | -0.004 (-0.009, -0.001)             | -0.74 (0.40)             | 0.0459         |
| <i>Cortical microarchitectural parameters</i>                |                                     |                          |                |
| Ct.Po (%)                                                    | 0.002 ( 0.001, 0.003)               | 0.17 (0.08)              | 0.0319         |
| Ct.Th (mm)                                                   | 0.005 (-0.006, 0.016)               | 0.97 (0.70)              | 0.3491         |

**Supplementary Table 2** Absolute change, percentage change, and significance of change of density and microarchitectural parameters in the posterior sector. Each absolute change is presented as a mean difference (with the 95% confidence interval [CI] in parentheses). Each percentage change is presented as a mean (with one standard error [SE] of the mean in parentheses).

|                                                              | <b>Absolute change<br/>(95% CI)</b> | <b>% change<br/>(SE)</b> | <b>p-value</b> |
|--------------------------------------------------------------|-------------------------------------|--------------------------|----------------|
| <i>Volumetric bone mineral density (mgHA/cm<sup>3</sup>)</i> |                                     |                          |                |
| Tt.vBMD                                                      | 4.54 ( 3.97, 5.32)                  | 1.87 (0.27)              | <0.0001        |
| Tb.vBMD                                                      | 1.96 ( 1.01, 2.91)                  | 1.09 (0.27)              | <0.0001        |
| Ct.vBMD                                                      | 3.82 (-0.32, 7.97)                  | 0.51 (0.27)              | 0.0707         |
| <i>Trabecular microarchitectural parameters</i>              |                                     |                          |                |
| Tb.BV/TV                                                     | 0.003 ( 0.001, 0.004)               | 1.16 (0.29)              | <0.0001        |
| Tb.N (1/mm)                                                  | 0.012 (-0.006, 0.030)               | 0.81 (0.50)              | 0.1803         |
| Tb.Th (mm)                                                   | 0.002 ( 0.001, 0.003)               | 0.75 (0.21)              | 0.0009         |
| Tb.Sp (mm)                                                   | -0.003 (-0.007, 0.001)              | -0.51 (0.39)             | 0.1141         |
| <i>Cortical microarchitectural parameters</i>                |                                     |                          |                |
| Ct.Po (%)                                                    | 0.001 ( 0.000, 0.002)               | 0.06 (0.08)              | 0.4744         |
| Ct.Th (mm)                                                   | 0.026 ( 0.019, 0.033)               | 4.01 (0.54)              | <0.0001        |

**Supplementary Table 3** Absolute change, percentage change, and significance of change of density and microarchitectural parameters in the medial sector. Each absolute change is presented as a mean difference (with the 95% confidence interval [CI] in parentheses). Each percentage change is presented as a mean (with one standard error [SE] of the mean in parentheses).

|                                                              | <b>Absolute change<br/>(95% CI)</b> | <b>% change<br/>(SE)</b> | <b>p-value</b> |
|--------------------------------------------------------------|-------------------------------------|--------------------------|----------------|
| <i>Volumetric bone mineral density (mgHA/cm<sup>3</sup>)</i> |                                     |                          |                |
| Tt.vBMD                                                      | 5.54 ( 2.04, 9.05)                  | 2.66 (0.63)              | 0.0017         |
| Tb.vBMD                                                      | 3.58 ( 0.40, 6.75)                  | 2.26 (0.67)              | 0.0275         |
| Ct.vBMD                                                      | 6.99 ( 3.39, 10.61)                 | 0.88 (0.23)              | 0.0002         |
| <i>Trabecular microarchitectural parameters</i>              |                                     |                          |                |
| Tb.BV/TV                                                     | 0.005 ( 0.000, 0.009)               | 2.22 (0.66)              | 0.0383         |
| Tb.N (1/mm)                                                  | 0.005 (-0.010, 0.020)               | 0.37 (0.43)              | 0.4967         |
| Tb.Th (mm)                                                   | 0.004 ( 0.002, 0.006)               | 1.76 (0.42)              | 0.0004         |
| Tb.Sp (mm)                                                   | -0.002 (-0.006, 0.002)              | -0.19 (0.43)             | 0.4520         |
| <i>Cortical microarchitectural parameters</i>                |                                     |                          |                |
| Ct.Po (%)                                                    | -0.000 (-0.002, 0.001)              | -0.03 (0.09)             | 0.7290         |
| Ct.Th (mm)                                                   | 0.021 ( 0.013, 0.030)               | 4.10 (0.80)              | <0.0001        |

**Supplementary Table 4** Absolute change, percentage change, and significance of change of density and microarchitectural parameters in the anterior sector. Each absolute change is presented as a mean difference (with the 95% confidence interval [CI] in parentheses). Each percentage change is presented as a mean (with one standard error [SE] of the mean in parentheses).

|                                                              | <b>Absolute change<br/>(95% CI)</b> | <b>% change<br/>(SE)</b> | <b>p-value</b> |
|--------------------------------------------------------------|-------------------------------------|--------------------------|----------------|
| <i>Volumetric bone mineral density (mgHA/cm<sup>3</sup>)</i> |                                     |                          |                |
| Tt.vBMD                                                      | 2.74 ( 0.74, 4.73)                  | 1.60 (0.46)              | 0.0075         |
| Tb.vBMD                                                      | 2.04 ( 0.33, 3.74)                  | 1.64 (0.48)              | 0.0195         |
| Ct.vBMD                                                      | -0.84 (-4.79, 3.12)                 | -0.05 (0.25)             | 0.6755         |
| <i>Trabecular microarchitectural parameters</i>              |                                     |                          |                |
| Tb.BV/TV                                                     | 0.002 ( 0.000, 0.005)               | 1.30 (0.48)              | 0.0817         |
| Tb.N (1/mm)                                                  | 0.008 (-0.005, 0.021)               | 0.56 (0.40)              | 0.2254         |
| Tb.Th (mm)                                                   | 0.002 ( 0.001, 0.002)               | 0.97 (0.23)              | 0.0002         |
| Tb.Sp (mm)                                                   | -0.003 (-0.006, 0.001)              | -0.37 (0.36)             | 0.1902         |
| <i>Cortical microarchitectural parameters</i>                |                                     |                          |                |
| Ct.Po (%)                                                    | 0.002 ( 0.000, 0.004)               | 0.18 (0.12)              | 0.1489         |
| Ct.Th (mm)                                                   | 0.005 (-0.004, 0.014)               | 1.00 (0.69)              | 0.2643         |

**Supplementary Table 5** Absolute change, percentage change, and significance of change of density and microarchitectural parameters in the cross section. Each absolute change is presented as a mean difference (with the 95% confidence interval [CI] in parentheses). Each percentage change is presented as a mean (with one standard error [SE] of the mean in parentheses).

|                                                              | <b>Absolute change<br/>(95% CI)</b> | <b>% change<br/>(SE)</b> | <b>p-value</b> |
|--------------------------------------------------------------|-------------------------------------|--------------------------|----------------|
| <i>Volumetric bone mineral density (mgHA/cm<sup>3</sup>)</i> |                                     |                          |                |
| Tt.vBMD                                                      | 3.97 ( 2.20, 5.75)                  | 1.88 (0.37)              | <0.0001        |
| Tb.vBMD                                                      | 2.52 ( 1.04, 4.00)                  | 1.58 (0.38)              | 0.0011         |
| Ct.vBMD                                                      | 0.96 (-1.75, 3.64)                  | 0.14 (0.16)              | 0.4804         |
| <i>Trabecular microarchitectural parameters</i>              |                                     |                          |                |
| Tb.BV/TV                                                     | 0.003 ( 0.001, 0.006)               | 1.50 (0.38)              | 0.0024         |
| Tb.N (1/mm)                                                  | 0.011 (-0.003, 0.024)               | 0.70 (0.41)              | 0.1302         |
| Tb.Th (mm)                                                   | 0.002 ( 0.000, 0.003)               | 1.08 (0.25)              | 0.0002         |
| Tb.Sp (mm)                                                   | -0.003 (-0.006, 0.000)              | -0.52 (0.32)             | 0.0540         |
| <i>Cortical microarchitectural parameters</i>                |                                     |                          |                |
| Ct.Po (%)                                                    | 0.000 (-0.000, 0.001)               | 0.03 (0.02)              | 0.1417         |
| Ct.Th (mm)                                                   | 0.013 ( 0.006, 0.020)               | 2.02 (0.49)              | 0.0003         |
